# Supplementary material for: Curcumin ameliorates atrophy of seminal vesicle via reduction of oxidative stress in castrated mice
Source: PeerJ. 2019 Jul 5;7:e7192. doi: 10.7717/peerj.7192 (PMC6613531; doi:10.7717/peerj.7192)
Supplement: Supplemental Information 2 [file peerj-07-7192-s002.xlsx]

## Sheet: Sheet1
	Control	Castration	Castration+Curcumin
1	12.3	33.3	21.8
2	17.9	42.9	19.1
3	12.3	47.6	28.8
4	10.2	48.1	31.9
