# Supplementary material for: Curcumin ameliorates atrophy of seminal vesicle via reduction of oxidative stress in castrated mice
Source: PeerJ. 2019 Jul 5;7:e7192. doi: 10.7717/peerj.7192 (PMC6613531; doi:10.7717/peerj.7192)
Supplement: Supplemental Information 3 [file peerj-07-7192-s003.xlsx]

## Sheet: Sheet1
	Control	Castration	Castration+Curcumin
1	1.23	6.98	5.12
2	0.95	5.72	2.78
3	3.56	4.21	3.32
4	1.31	6.64	4.31
5	1.09	5.21	2.32
